# Supplementary material for: Angiotensin II Inhibits Insulin Receptor Signaling in Adipose Cells
Source: MDPI journal article supplement (doi:10.3390/ijms23116048), 2022-05-27
Supplement: s1 [file s1]

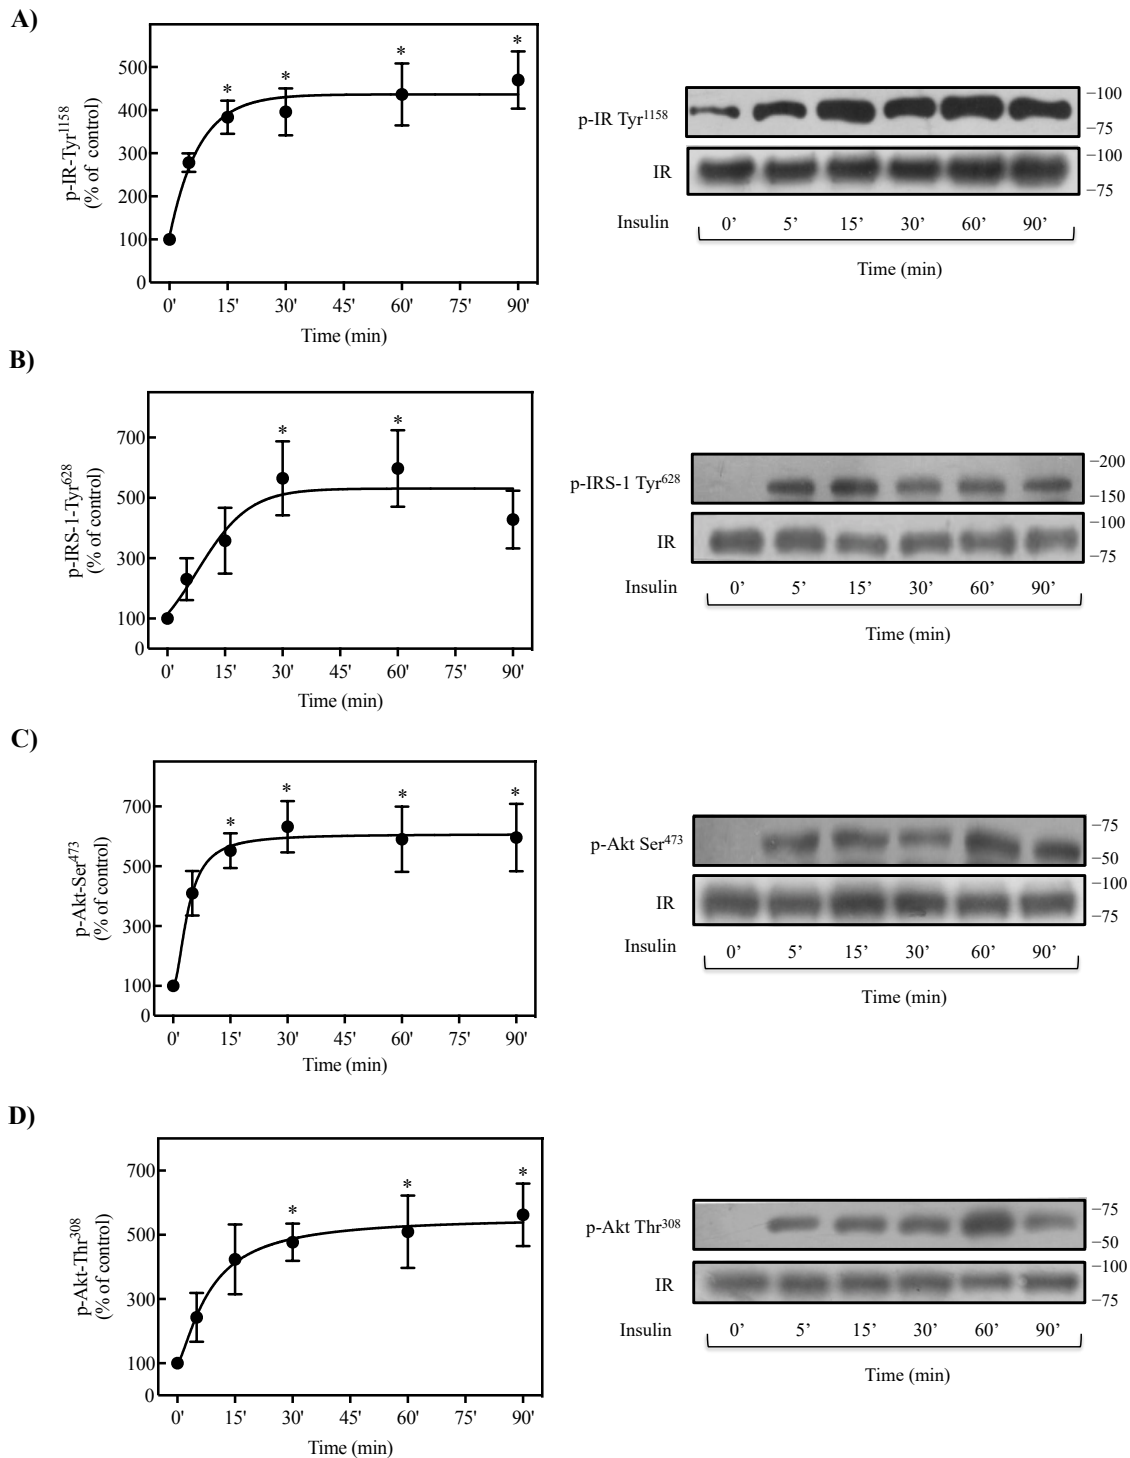

Supplementary Figure S1. **Effect of insulin on IR, IRS, and Akt phosphorylation.** 3T3-L1 adipocytes were treated with 100 nM insulin for the indicated times. Total cell lysates were separated by SDS-PAGE and analyzed by immunoblotting with anti-p-IR Tyr<sup>1158</sup> (A), anti-p-IRS Tyr<sup>628</sup> (B), anti-p-Akt Ser<sup>473</sup> (C) or anti-p-Akt Thr<sup>308</sup> (D), as described in materials and methods. IR, IRS, and Akt phosphorylation was quantitated by densitometry, and the mean values were plotted from three-five independent experiments. Vertical lines represent the S.E.M. Representative immunoblots are presented. Western blots were also probed for total IR, as loading control. \*  $p < 0.05$  vs time 0' (control).

A)

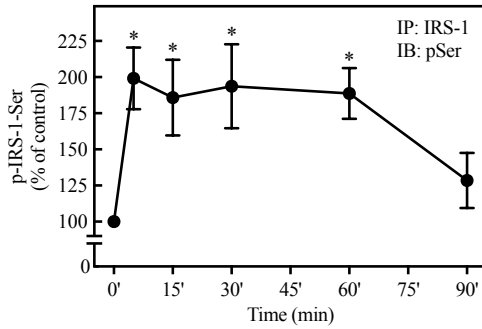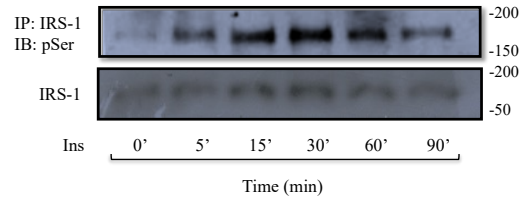

B)

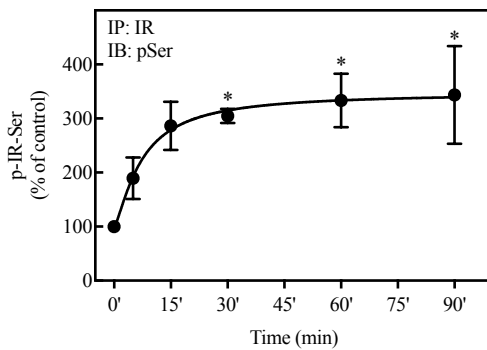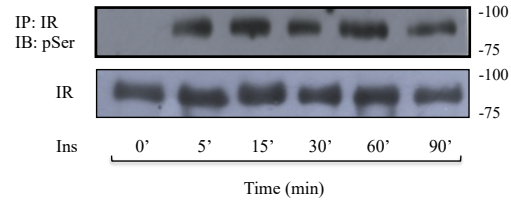

C)

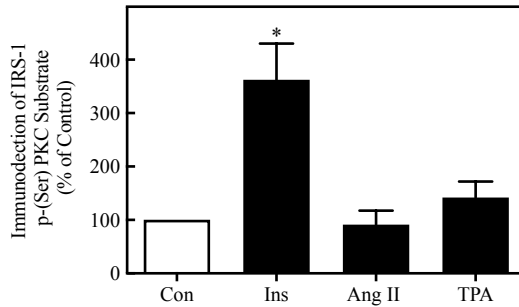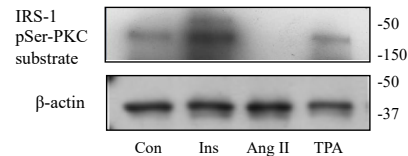

Supplementary Figure S2. **Insulin promotes IR- and IRS-1-Ser-phosphorylation.** (A and B) 3T3-L1 adipocytes were stimulated with 100 nM insulin for the indicated times. Total cell lysates were immunoprecipitated with anti-IRS-1 (A) or anti-IR (B) antibody before SDS-PAGE analysis and immunoblotted with an anti-phospho-Ser antibody. (C) 3T3-L1 adipocytes were stimulated with 100 nM insulin, Ang II, or TPA for 60 minutes. Total cell lysates were immunoprecipitated with anti-IRS-1 antibody before SDS-PAGE analysis and immunoblotted with an anti-phospho-(Ser) PKC substrate antibody. Blots were quantitated by densitometry, and the mean values were plotted from three-five independent experiments. Vertical lines represent the S.E.M. Representative immunoblots are presented. Western blots were also probed for total IRS-1 (A), IR (B) or β-actin (C), as loading control. (A and B) \*p < 0.05 vs time 0' (control). (C) \*p < 0.05 vs control. Con, control; Ins, insulin; TPA, 12-O-Tetradecanoylphorbol-13-acetate

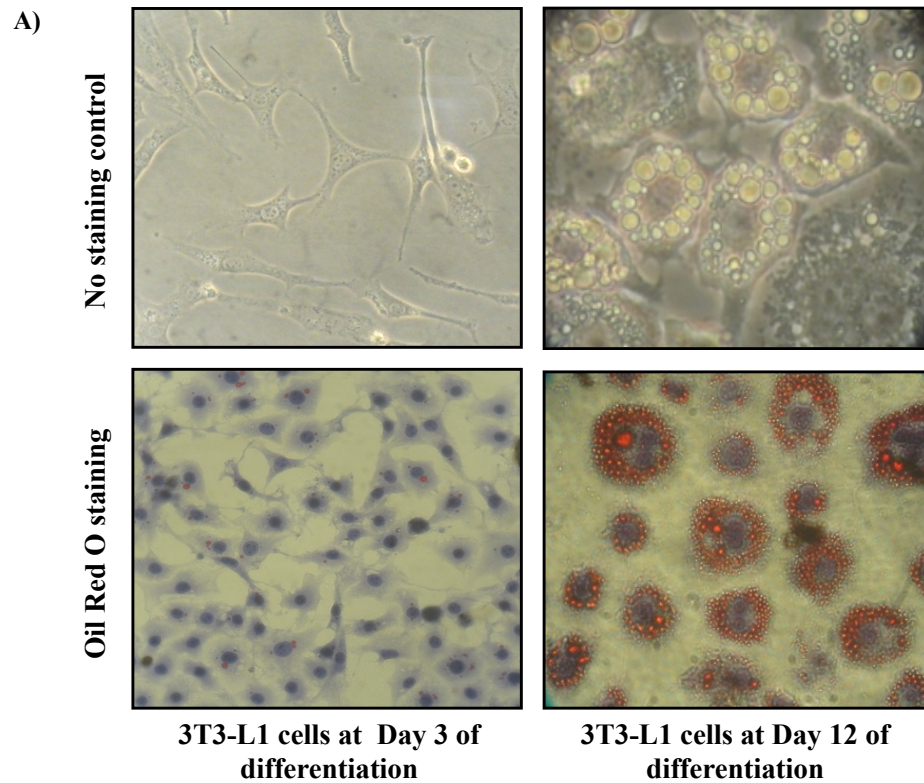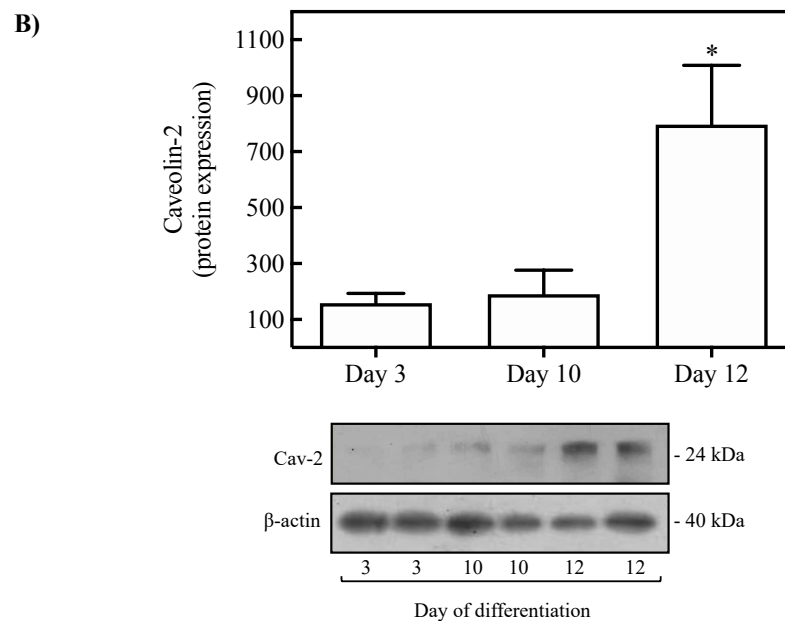

Supplementary Figure S3. **Differentiation of 3T3-L1 cells into adipocytes.** (A) Lipid accumulation in 3T3L1 adipocytes after 3 and 10 days of induction of adipogenic differentiation. Cells were fixed, and lipid droplets were stained with Oil Red O dye and visualized with an Olympus CKX41 optical microscope. (B) 3T3-L1 cells were lysed on days 3, 10, and 12 of the differentiation processes. Total cell lysates were separated by SDS-PAGE and analyzed by immunoblotting with anti-caveolin-2. Blots were quantitated by densitometry, and the mean values from three independent experiments were plotted. \* $p < 0.05$  vs days 3 and 10.

| <i>Primary antibodies</i>                             | <i>Source</i>          | <i>Catalog no.</i> | <i>Clone</i>      | <i>Dilutions</i> |
|-------------------------------------------------------|------------------------|--------------------|-------------------|------------------|
| p-Akt (Ser <sup>473</sup> )                           | Santa Cruz             | sc-7985            | Rabbit polyclonal | 1:6000           |
| p-Akt (Thr <sup>308</sup> )                           | Santa Cruz             | sc-135650          | Rabbit polyclonal | 1:6000           |
| p-IRS-1 (Tyr <sup>632</sup> )                         | Santa Cruz             | sc-17196           | Rabbit polyclonal | 1:4000           |
| p-PKC $\alpha$ (Ser <sup>657</sup> )                  | Santa Cruz             | sc-12356           | Goat polyclonal   | 1:3000           |
| p-PKC $\epsilon$ (Ser <sup>729</sup> )                | Santa Cruz             | sc-12355           | Rabbit polyclonal | 1:3000           |
| *IR- $\beta$                                          | Santa Cruz             | sc-711             | Rabbit polyclonal | 1:1000           |
| PKC $\alpha$                                          | Santa Cruz             | sc-208             | Rabbit polyclonal | 1:3000           |
| *PKC $\beta$ I                                        | Santa Cruz             | sc-209             | Rabbit polyclonal | 1:3000           |
| PKC $\beta$ II                                        | Santa Cruz             | sc-210             | Rabbit polyclonal | 1:3000           |
| PKC $\delta$                                          | Santa Cruz             | sc-213             | Rabbit polyclonal | 1:3000           |
| PKC $\epsilon$                                        | Santa Cruz             | sc-214             | Goat polyclonal   | 1:6000           |
| $\beta$ -Actin                                        | Santa Cruz             | sc-1616            | Goat polyclonal   | 1:5000           |
| p-FKHR (Ser <sup>256</sup> )                          | Cell Signaling         | #9461              | Rabbit polyclonal | 1:3000           |
| p-IRS-1 (Ser <sup>612</sup> )                         | Cell Signaling         | #2386              | Rabbit polyclonal | 1:4000           |
| p-PKC $\alpha$ / $\beta$ II (Thr <sup>638/641</sup> ) | Cell Signaling         | #9375              | Rabbit polyclonal | 1:6000           |
| p-PKC $\delta$ / $\theta$ (Ser <sup>643/676</sup> )   | Cell Signaling         | #9276              | Rabbit polyclonal | 1:6000           |
| p-Ser-PKC substrate                                   | Cell Signaling         | #2261              | Rabbit polyclonal | 1:6000           |
| *IRS-1                                                | Cell Signaling         | #2382              | Rabbit polyclonal | 1:1000           |
| p-IR (Tyr <sup>1158</sup> )                           | Invitrogen             | 44-802G            | Rabbit polyclonal | 1:3000           |
| p-IRS-1 (Tyr <sup>632</sup> )                         | Merck Millipore        | #09-433            | Mouse monoclonal  | 1:4000           |
| p-Ser (clone 4A4)                                     | Merck Millipore        | #05-1000           | Mouse monoclonal  | 1:2000           |
| <i>Secondary antibodies</i>                           | <i>Source</i>          | <i>Catalog no.</i> | <i>Clone</i>      | <i>Dilutions</i> |
| Goat IgG-HRP                                          | Jackson ImmunoResearch | 305-035-003        | Rabbit polyclonal | 1:5000           |
| Mouse IgG-HRP                                         | Santa Cruz             | sc-2005            | Goat polyclonal   | 1:5000           |
| Rabbit IgG-HRP                                        | Santa Cruz             | sc-2004            | Goat polyclonal   | 1:5000           |

Supplementary Table S1. *Table of antibodies used for western blot and \*immunoprecipitation studies.*

## **Supplementary Methods**

### **Oil red O staining in 3T3-L1 cells**

Lipid accumulation in 3T3L1 adipocytes was evaluated by Oil Red O staining after 3 and 10 days of adipogenic differentiation induction. After washing with 2 ml of DPBS, cell cultures were fixed for 30 min with 10% formalin. Then, cells were washed with sterile double distilled water and subsequently with 99% isopropanol for 2 min and stained with a filtered Oil Red O solution with 2 parts of deionized water and allow to sit at room temperature for 10 minutes. Cells were washed with sterile double distilled water and stained with Mayer's Hematoxylin Bio-Optica ready to use solution for 1 min at room temperature and washed again with sterile double distilled water (AdipoRed™ Adipogenesis Assay Reagent from LONZA). The cells were observed with an optical microscope Olympus CKX41 20X and Nikon Digital camera.
